# Supplementary material
Source: PubMed Central journal article supplement (PMC6145643)
Supplement: jamadermatol-154-670-s001.pdf [file jamadermatol-154-670-s001.pdf]

## Supplementary Online Content

Freites-Martinez A, Shapiro J, Chan D, et al. Endocrine therapy–induced alopecia in patients with breast cancer. *JAMA Dermatol*. Published online April 11, 2018. doi:10.1001/jamadermatol.2018.0454

**eAppendix.** Hairdex Questionnaire (modified English version)

This supplementary material has been provided by the authors to give readers additional information about their work.

**eAppendix. Hairdex Questionnaire (modified English version)**

Please answer the following statements with the appropriate answer on a scale from 0 to 4. For example, check 0 if you **never agree** with the statement, or check 4 if you **always agree** with the statement.

| #   | Item                                                                              | 0     | 1      | 2         | 3     | 4      |
|-----|-----------------------------------------------------------------------------------|-------|--------|-----------|-------|--------|
|     |                                                                                   | Never | Seldom | Sometimes | Often | Always |
| 1.  | My scalp hurts                                                                    |       |        |           |       |        |
| 2.  | The state of my hair has an influence on how well I sleep                         |       |        |           |       |        |
| 3.  | I worry that my hair loss may be something serious                                |       |        |           |       |        |
| 4.  | My hair condition interferes with my work or my leisure activities                |       |        |           |       |        |
| 5.  | My hair condition affects my social life                                          |       |        |           |       |        |
| 6.  | My hair condition makes me feel depressed                                         |       |        |           |       |        |
| 7.  | My scalp burns or stings                                                          |       |        |           |       |        |
| 8.  | I tend to stay at home because of my hair loss                                    |       |        |           |       |        |
| 9.  | I worry that the condition of my scalp may lead to scars/disfiguration            |       |        |           |       |        |
| 10. | My scalp itches                                                                   |       |        |           |       |        |
| 11. | My hair condition affects how close I can be with those I love/people close to me |       |        |           |       |        |
| 12. | I am ashamed due to my hair                                                       |       |        |           |       |        |
| 13. | I worry that my hair loss may get worse                                           |       |        |           |       |        |
| 14. | I tend to do things alone due to my hair loss                                     |       |        |           |       |        |

|          |                                                                                            |                   |                    |                       |                   |                    |
|----------|--------------------------------------------------------------------------------------------|-------------------|--------------------|-----------------------|-------------------|--------------------|
| 15.      | My hair condition makes me angry                                                           |                   |                    |                       |                   |                    |
| 16.      | Water (bathing, washing) bothers my scalp or my hair                                       |                   |                    |                       |                   |                    |
| 17.      | My hair condition makes showing affection difficult                                        |                   |                    |                       |                   |                    |
| 18.      | My scalp is in bad condition                                                               |                   |                    |                       |                   |                    |
| 19.      | My scalp is irritated                                                                      |                   |                    |                       |                   |                    |
| 20.      | My hair condition affects my interactions with others                                      |                   |                    |                       |                   |                    |
| 21.      | My hair loss is embarrassing me                                                            |                   |                    |                       |                   |                    |
| 22.      | My hair loss is a problem for the people I love                                            |                   |                    |                       |                   |                    |
| 23.      | My hair condition is frustrating me                                                        |                   |                    |                       |                   |                    |
| <b>#</b> | <b>Item</b>                                                                                | <b>0</b><br>Never | <b>1</b><br>Seldom | <b>2</b><br>Sometimes | <b>3</b><br>Often | <b>4</b><br>Always |
| 24.      | My hair is very sensitive                                                                  |                   |                    |                       |                   |                    |
| 25.      | I tend to interact less with others because of my hair condition                           |                   |                    |                       |                   |                    |
| 26.      | I feel humiliated by my hair condition                                                     |                   |                    |                       |                   |                    |
| 27.      | My scalp bleeds                                                                            |                   |                    |                       |                   |                    |
| 28.      | The condition of my scalp/hair makes me annoyed and cranky                                 |                   |                    |                       |                   |                    |
| 29.      | My hair loss interferes with my sex life                                                   |                   |                    |                       |                   |                    |
| 30.      | My hair conditions annoys me                                                               |                   |                    |                       |                   |                    |
| 31.      | I can handle my hair condition                                                             |                   |                    |                       |                   |                    |
| 32.      | I have problems sitting in the bus, cinema or theater where others can see my hair closely |                   |                    |                       |                   |                    |
| 33.      | Despite my hair condition I am content with myself                                         |                   |                    |                       |                   |                    |
| 34.      | I feel like an outsider because of my hair condition                                       |                   |                    |                       |                   |                    |
| 35.      | Despite my hair condition life is worth living                                             |                   |                    |                       |                   |                    |

|     |                                                                                        |  |  |  |  |  |
|-----|----------------------------------------------------------------------------------------|--|--|--|--|--|
| 36. | I worry that I may look old because of my hair condition                               |  |  |  |  |  |
| 37. | My hair condition makes it difficult to achieve as much I usually do                   |  |  |  |  |  |
| 38. | Others make fun of me because of my hair condition                                     |  |  |  |  |  |
| 39. | Overall I have a good self-confidence despite my hair condition                        |  |  |  |  |  |
| 40. | Others show understanding for my hair condition                                        |  |  |  |  |  |
| 41. | I go to the hairdresser/hair-salon as often as usual despite my hair/scalp condition   |  |  |  |  |  |
| 42. | Others talk behind my back about my hair condition                                     |  |  |  |  |  |
| 43. | Compared to others I am lucky to have this hair                                        |  |  |  |  |  |
| 44. | My hair condition is disfiguring me                                                    |  |  |  |  |  |
| 45. | I hate my hair when I see it in the sink, in the hairbrush or on the sofa              |  |  |  |  |  |
| 46. | My hair condition is the main feature people notice about me                           |  |  |  |  |  |
| 47. | I look in the mirror every morning and evening to see if my hair condition has changed |  |  |  |  |  |
| 48. | I haven't been taken seriously with my hair condition by my physician                  |  |  |  |  |  |

Have you answered all the questions in this study?  YES  NO

Signature \_\_\_\_\_ Date \_\_\_\_\_ Time \_\_\_\_\_
